# Supplementary material for: Heart graft preservation technics and limits: an update and perspectives
Source: Frontiers journal article supplement (doi:10.3389/fcvm.2023.1248606), 2023-11-06
Supplement: Data_Sheet_1.pdf [file Data_Sheet_1.pdf]

## SUPPLEMENTARY APPENDIX

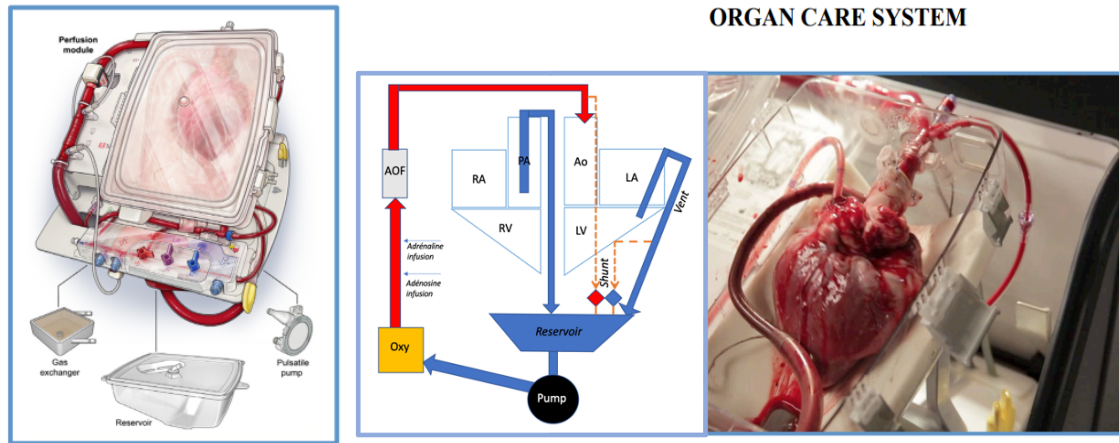

**Supplementary Figure 1: Organ Care System (OCS), Transmedics**

Ao: aortic root; LV: left ventricle; LA: left atrium; RA: right atrium; RV: right ventricle; AOF: aortic flow.

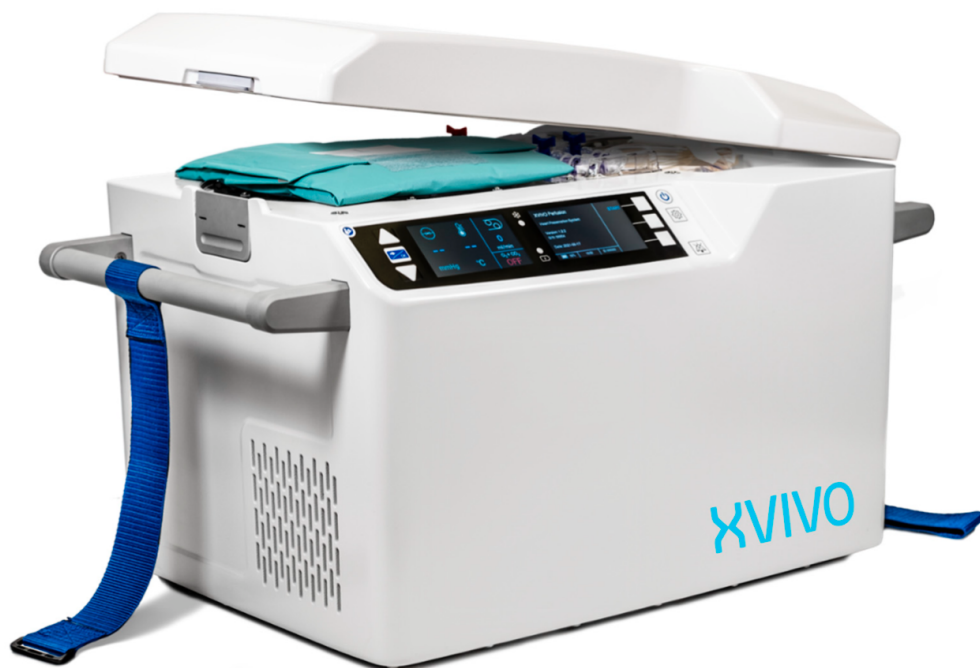

**Supplementary Figure 2 : XVIVO Heart Perfusion System.**

The heart is submerged in cold blood and cardioplegia solution. Continuous, hypothermic perfusion is established via the aortic root during transport.
